# Supplementary material for: A new Pb(iv)-based photocathode material Sr2PbO4with good light harvesting ability
Source: Royal Society of Chemistry journal article supplement (doi:10.1039/c5ta02349a), 2015-01-01
Supplement: c5ta02349a1.pdf [file c5ta02349a1.pdf]

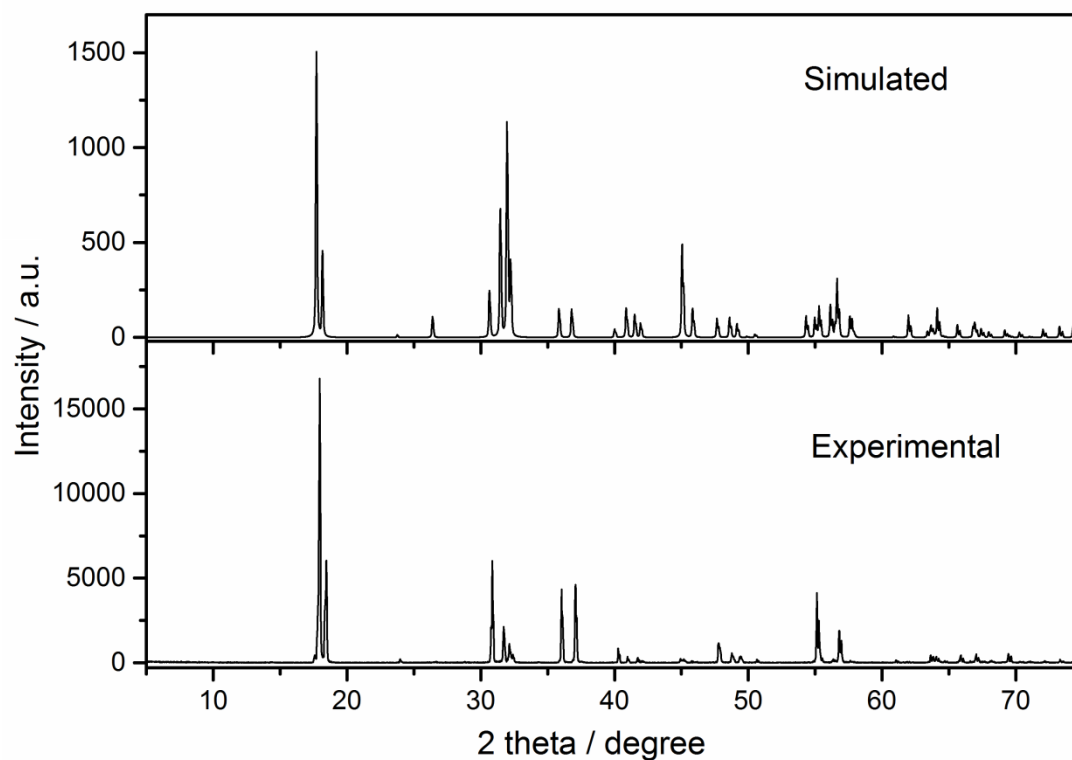

Figure S1. XRD pattern of  $\text{Ca}_2\text{PbO}_4$  experimental sample comparing with simulated data from single-crystal

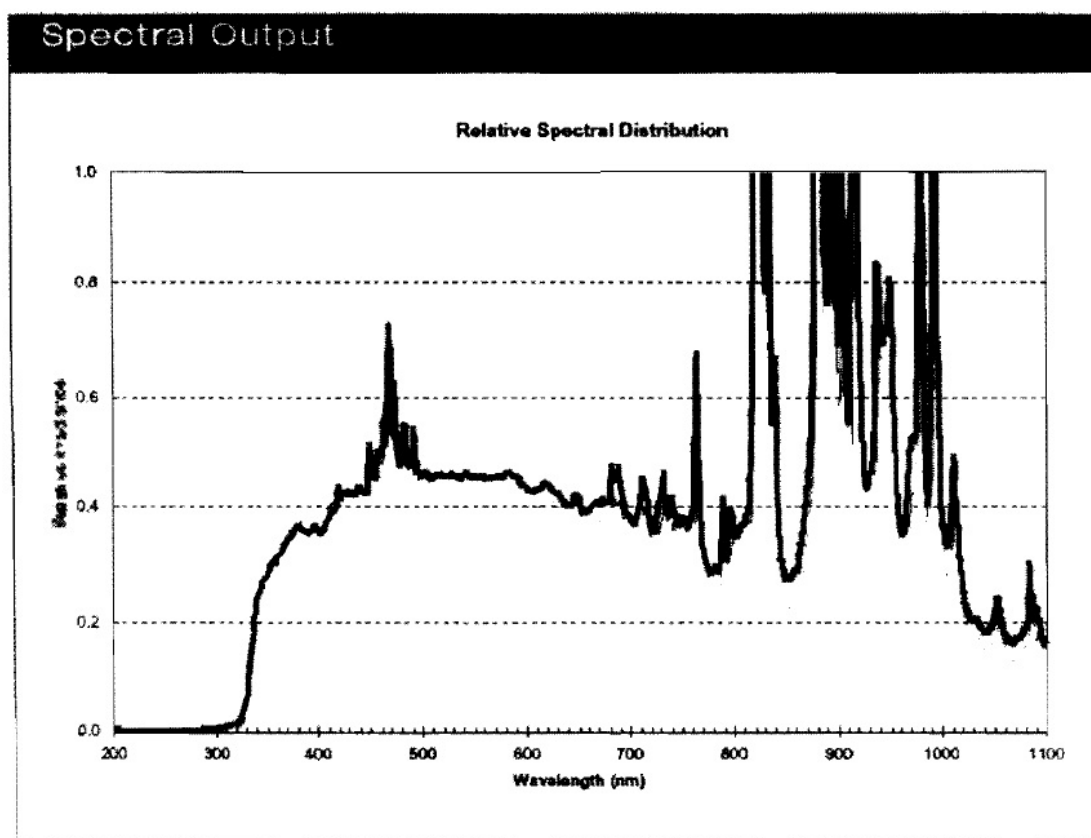

Figure S2. The relative spectral distribution of the 300 W Xe lamp.
